# Supplementary material for: Dual Targeting of EGFR and HER3 with MEHD7945A Overcomes Acquired Resistance to EGFR Inhibitors and Radiation
Source: Oxford University Press journal article supplement (doi:10.1158/0008-5472.can-12-1611), 2012-11-20
Supplement: 00085472can121611-sup-fl_pdf_63kb.pdf [file 00085472can121611-sup-fl_pdf_63kb.pdf]

## **SUPPLEMENTARY FIGURE LEGENDS**

**Fig. 1S. Effect of MEHD7945A on cell cycle progression and EGFR/HER3 signaling in cetuximab-resistant cells.** CetR H226 or SCC6 cells were either non-treated (control) or treated with 10 µg/ml of cetuximab (Cet) or MEHD7945A (MEHD) for 24 hrs. Cells were then harvested and processed for flow cytometric cell cycle analysis (A) or immunoblotting analysis (B) as described in “Materials and Methods”.

**Fig. 2S. MEHD7945A increases cell fraction in apoptotic sub-G0 phase.** CetR H226 or SCC6 cells were either non-treated (NT) or pre-treated with 10 µg/ml of cetuximab (Cet) or MEHD7945A (MEHD) for 24 hrs followed by 6 Gy radiation. Cells were then harvested at day 0 (D0), day 1 (D1) or day 2 (D2) following radiation and processed for cell cycle analysis by flow cytometry as described in “Materials and Methods”.

**Fig. 3S. MEHD7945A is more potent than the combination of cetuximab and erlotinib.** CetR H226 or SCC6 cells were either non-treated (NT) or treated with 10 µg/ml of cetuximab (C), MEHD7945A (M) or the combination of cetuximab and erlotinib with doses indicated in the graph for 96 hrs. Thereafter, growth of tumor cells was determined by cell proliferation analysis. \* $p < 0.05$ , Student's t test, MEHD7945A versus cetuximab+5 µM erlotinib.
