# Supplementary figures and images for: Dual Targeting of EGFR and HER3 with MEHD7945A Overcomes Acquired Resistance to EGFR Inhibitors and Radiation
Source: Oxford University Press journal article supplement (doi:10.1158/0008-5472.can-12-1611), 2012-11-20

Supplemental  
Fig. 1

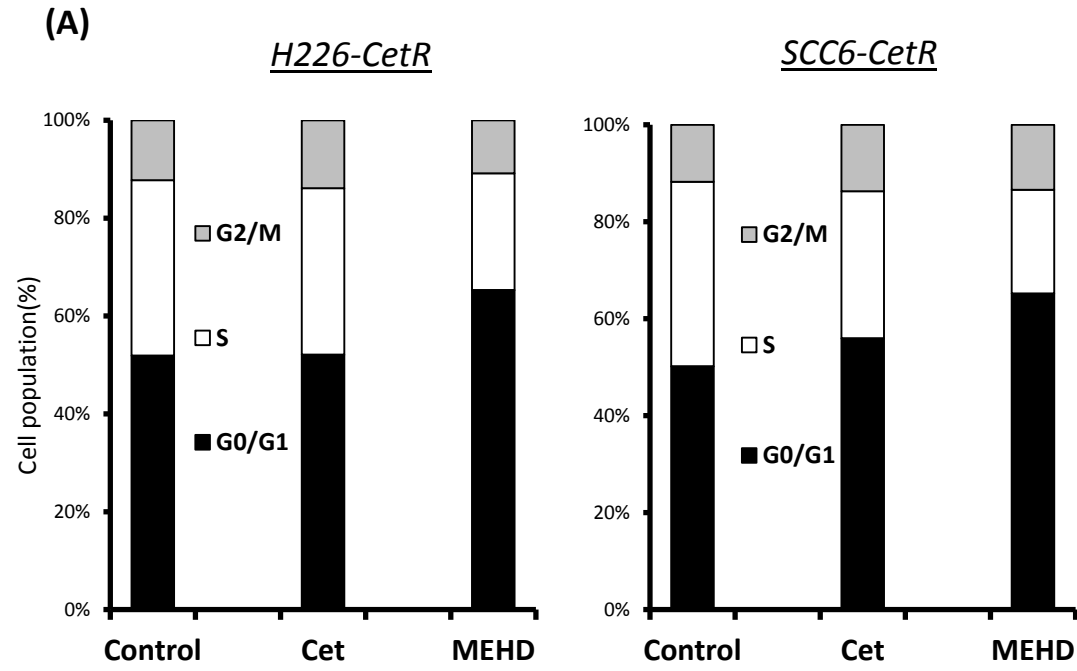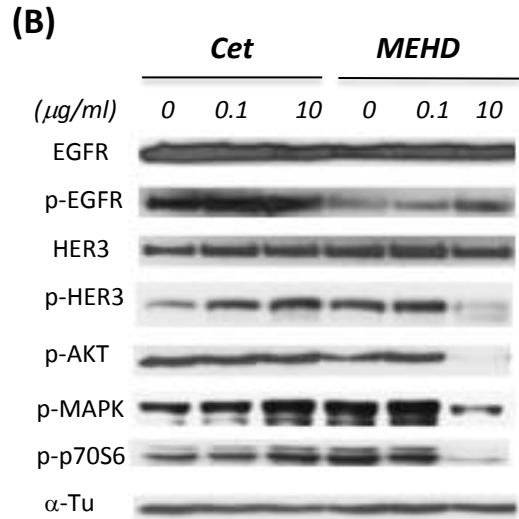

Supplement: 00085472can121611-sup-fig_1_pdf_23kb.pdf [file 00085472can121611-sup-fig_1_pdf_23kb.pdf]

Supplemental  
Fig. 2

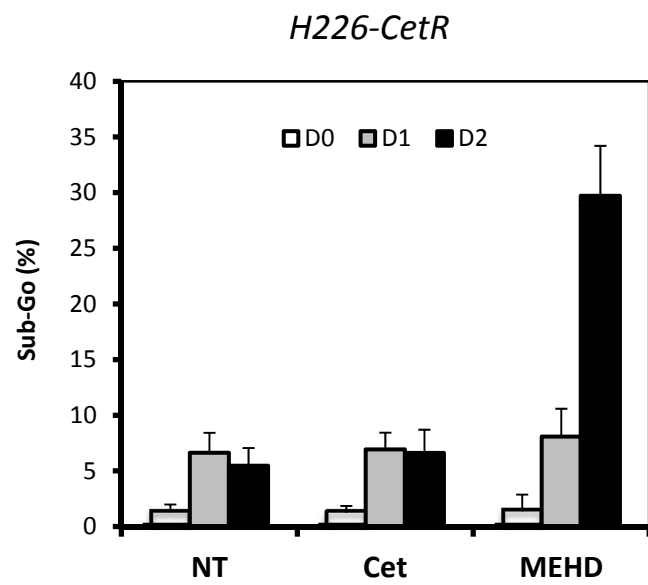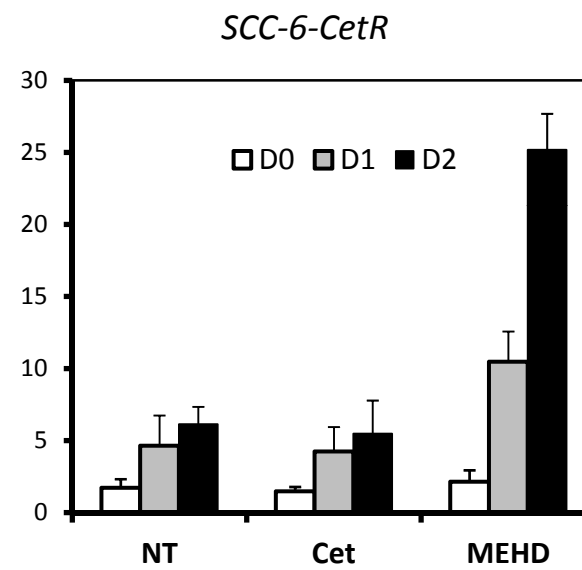

Supplement: 00085472can121611-sup-fig_2_pdf_51kb.pdf [file 00085472can121611-sup-fig_2_pdf_51kb.pdf]

Supplemental  
Fig. 3

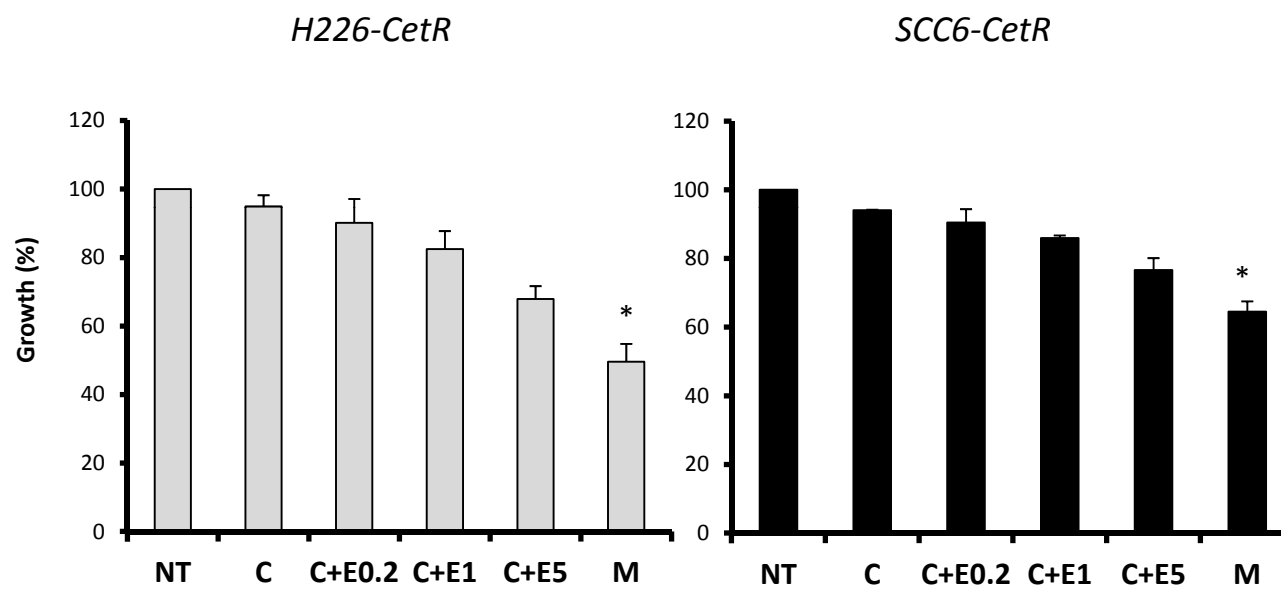

**NT:** No treatment  
**C:** Cet  
**C+E0.2:** Cet+0.2  $\mu$ M Erl  
**C+E1:** Cet+1  $\mu$ M Erl  
**C+E5:** Cet+5  $\mu$ M Erl  
**M:** MEHD

Supplement: 00085472can121611-sup-fig_3_pdf_52kb.pdf [file 00085472can121611-sup-fig_3_pdf_52kb.pdf]
